# Supplementary material for: Effect of surface modification on the distribution of magnetic nanorings in hepatocellular carcinoma and immune cells
Source: Royal Society of Chemistry journal article supplement (doi:10.1039/d3tb02560h), 2024-01-01
Supplement: d3tb02560h1.pdf [file d3tb02560h1.pdf]

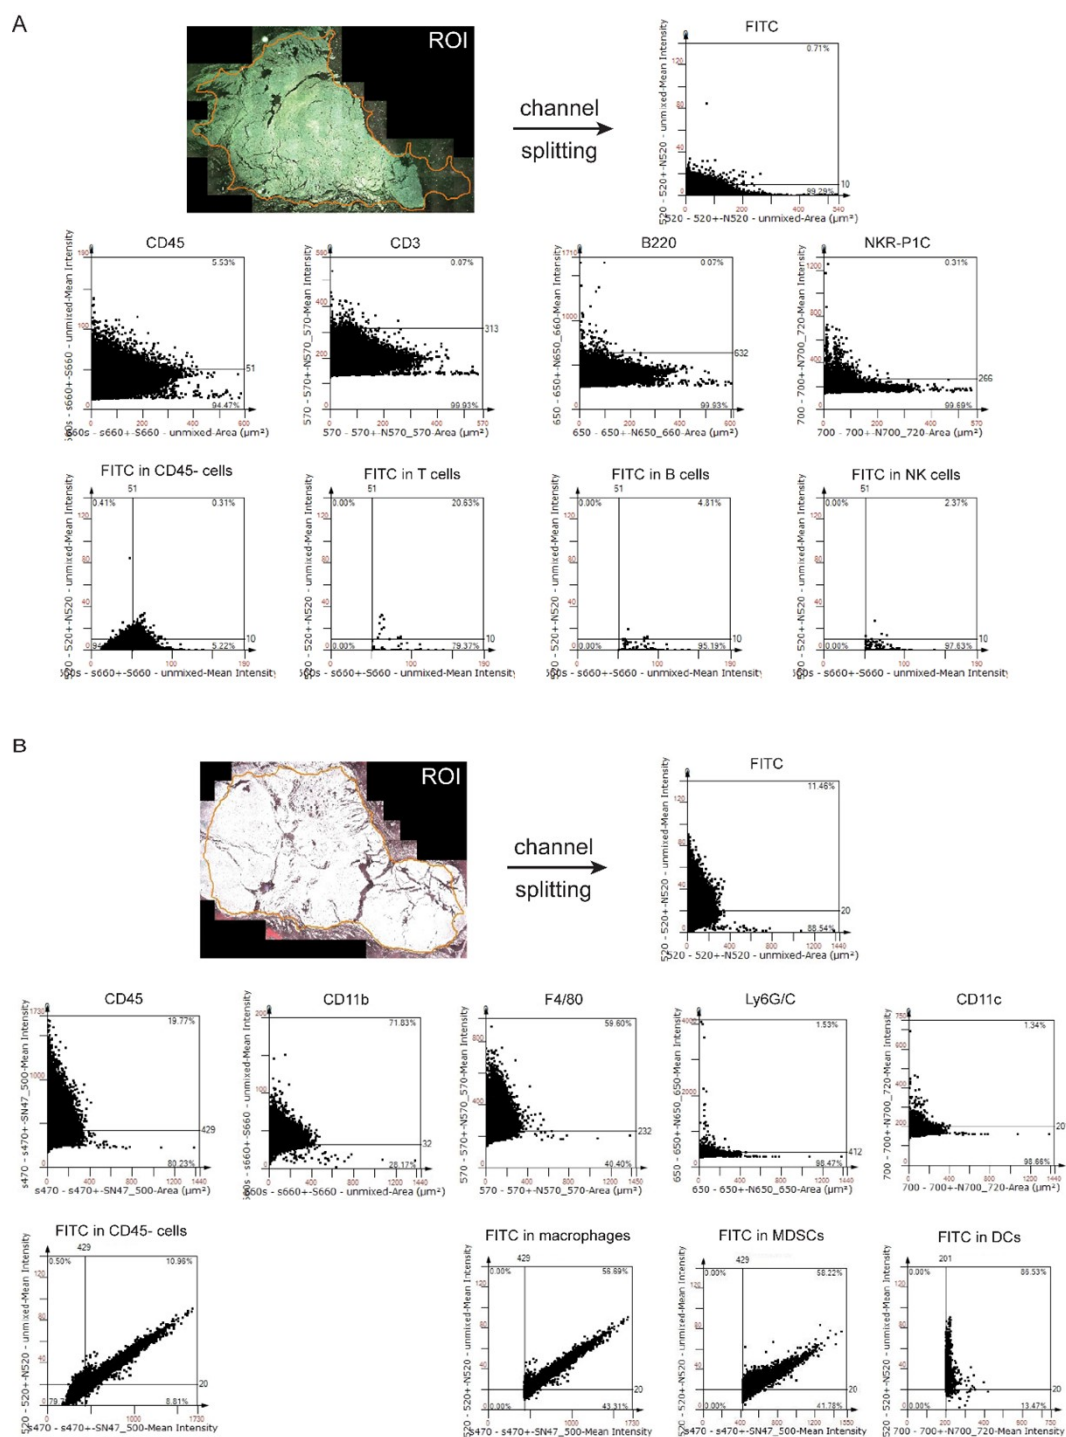

**Fig. S1** Gating strategies of (A) six-color sections for lymphocytes and (B) seven-color sections for myeloid cells. FVIOs were labeled with FITC.

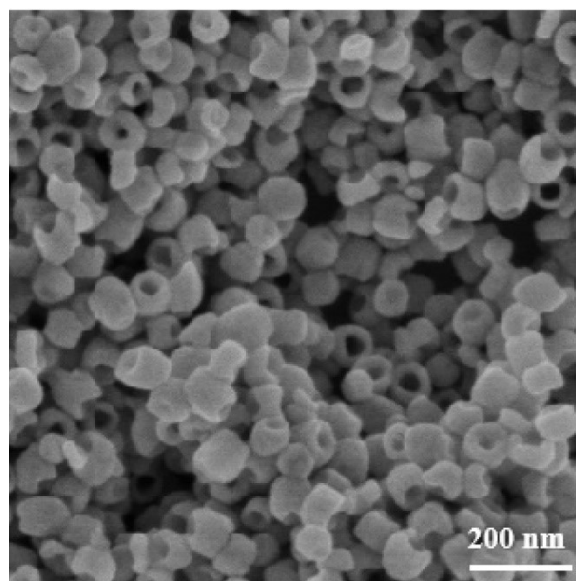

**Fig. S2** SEM image of FVIOs. Scale bar: 200 nm.

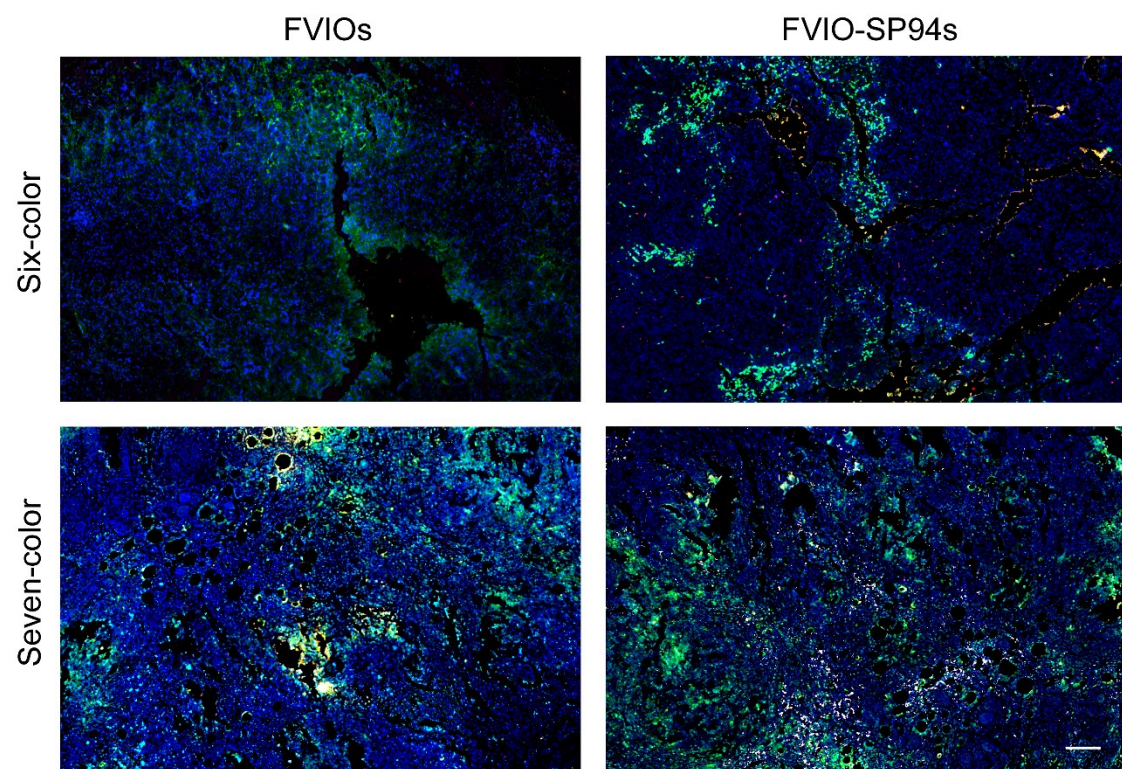

**Fig. S3** Six and seven-color multispectral fluorescence images of FVIOs and FVIOs-SP94 groups. Scale bar: 200  $\mu\text{m}$ .

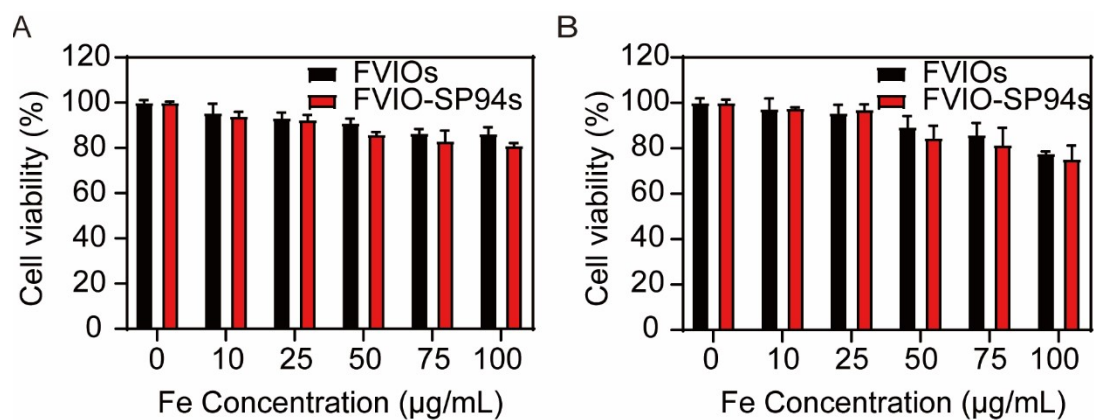

**Fig. S4** Cytotoxicity of (A) AML12 and (B) Hepa1-6 cells incubated with FVIOs or FVIO-SP94s.
